# Supplementary material for: Hollow Fiber Polyimide Membranes Prepared in a Triple Orifice Spinneret: Effect of a Reduced Water Activity in the Bore Fluid on the Gas Separation Performance
Source: MDPI journal article supplement (doi:10.3390/polym13132211), 2021-07-04
Supplement: s1 [file s1]

## Supporting Info

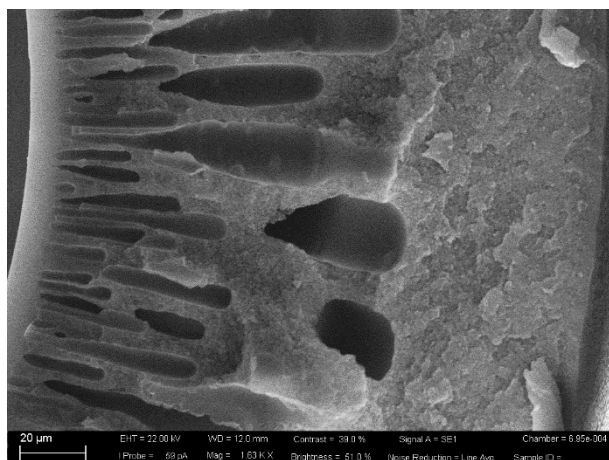

a)

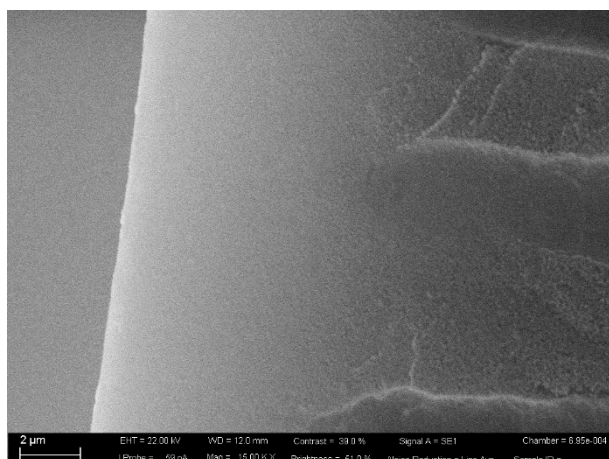

b)

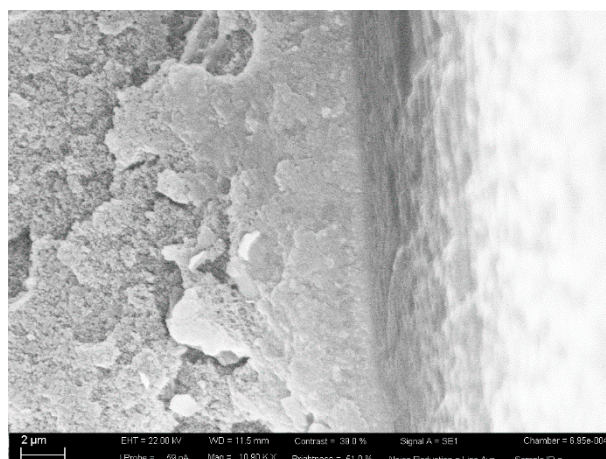

c)

H0 (BF=water; no EF)

**Figure S1.** SEM images of H0 HF: cross-section (a), magnification of the inner skin layer (b) and outer skin layer (c).

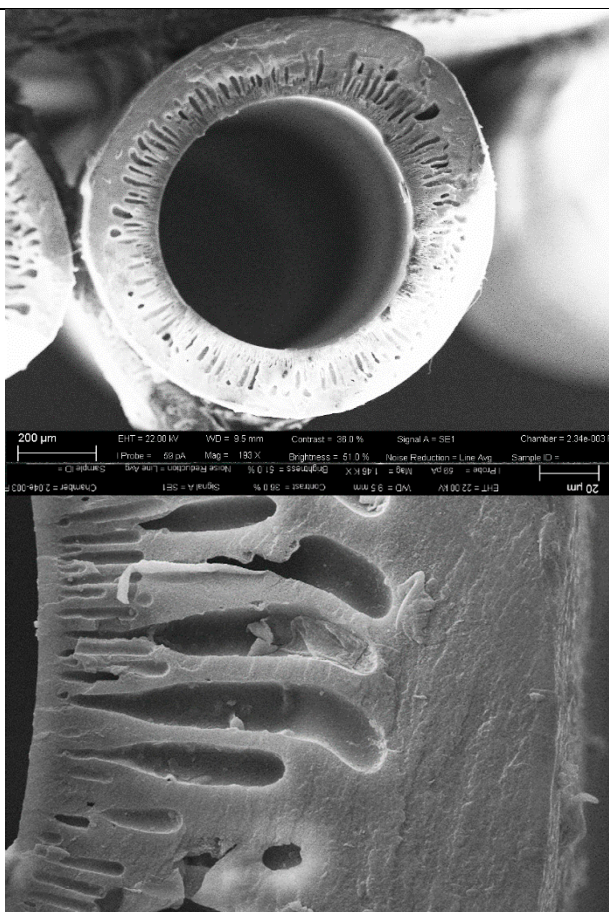

H1 (BF=water)

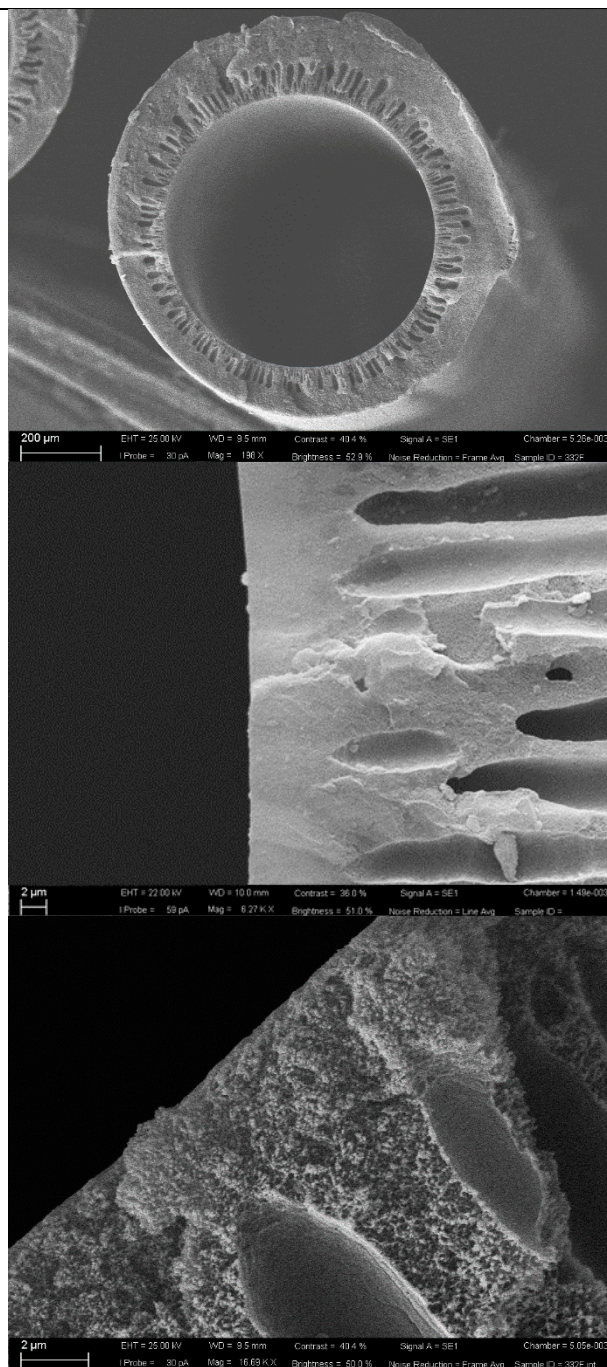

H4 (BF=NMP/water 60/40)

**Figure S2.** SEM images of H1 and H4 HF: cross-section and magnification of the inner skin layer.

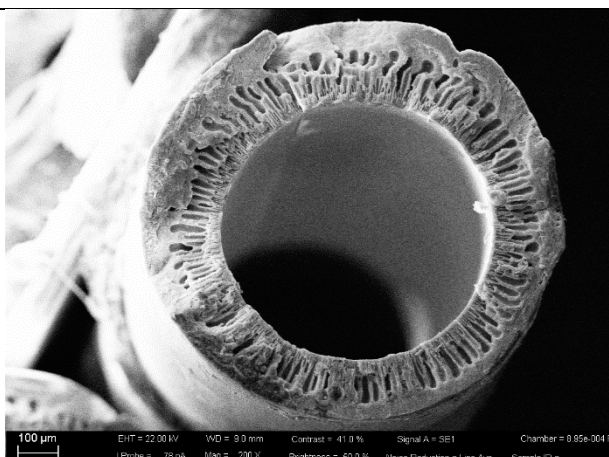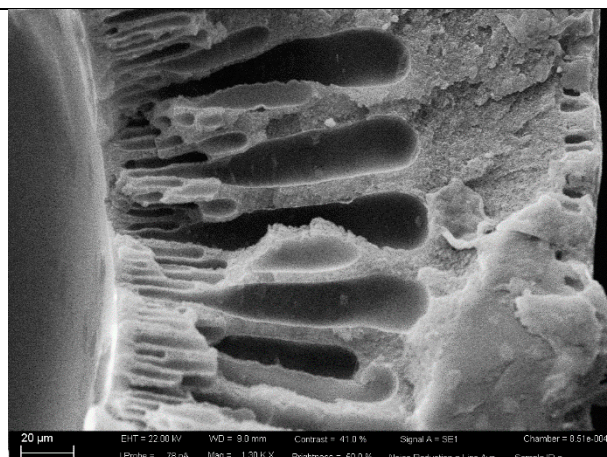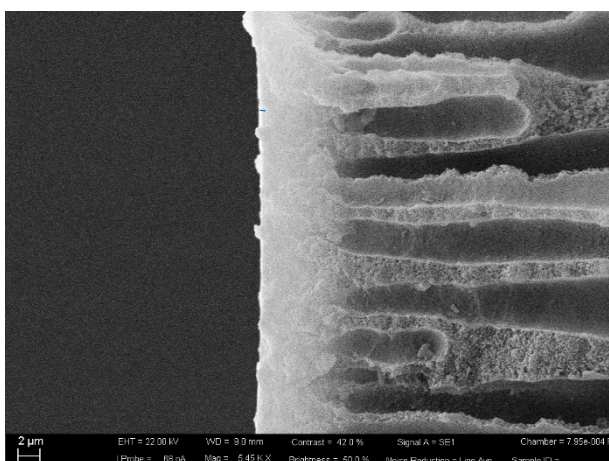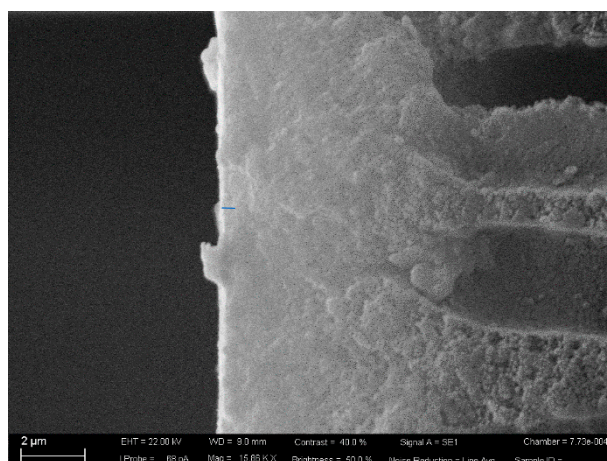

H2 (BF= NMP/water 20/80)

H3 (BF=NMP/water 30/70)

**Figure S3.** SEM images of H2 and H3 HF: cross-section and magnification of the inner skin layer.
